# Supplementary material for: Safety and efficacy profile of cyclin‐dependent kinases 4/6 inhibitor palbociclib in cancer therapy: A meta‐analysis of clinical trials
Source: PubMed Central journal article supplement (PMC6488107; doi:10.1002/cam4.1970), 2019-03-21

# **Safety and Efficacy Profile of CDK 4/6 Inhibitor Palbociclib in Cancer Therapy: A Meta-Analysis of Clinical Trials**

Linghong Guo<sup>2\*</sup>, Yuanyuan Hu<sup>2\*</sup>, Xi Chen<sup>3</sup>, Qingfang Li<sup>1</sup>, Benling Wei<sup>4</sup>, Xuelei Ma<sup>1\*</sup>

<sup>1</sup>State Key Laboratory of Biotherapy and Cancer Center, West China Hospital, Sichuan University, Chengdu, PR China

<sup>2</sup>West China School of Medicine, Sichuan University, Chengdu, PR China

<sup>3</sup>West China School of Stomatology, Sichuan University, Chengdu, PR China

<sup>4</sup>General Hospital of Xuzhou Mining Group, Xuzhou, PR China

\*Note: Linghong Guo, Yuanyuan Hu and Xuelei Ma contributed equally to this work

\*Corresponding author: Xuelei Ma, West China Hospital, No. 37, Guoxue Alley, Chengdu 610041, PR China. Tel: +86-28-85475576, Fax: +86-28-85475576, E-mail: [drmaxuelei@gmail.com](mailto:drmaxuelei@gmail.com)

## Figure legend

Supplementary Figure S1a. All grade adverse events in single arm groups (Fixed model).

Supplementary Figure S1b. All grade adverse events in single arm groups (Random model).

Supplementary Figure S2a. Grade $\geq$ 3 adverse events in single arm groups (Fixed model).

Supplementary Figure S2b. Grade $\geq$ 3 adverse events in single arm groups (Random model).

Supplementary Figure S3a. All grade adverse events in controlled groups (Fixed model).

Supplementary Figure S3b. All grade adverse events in controlled groups (Random model).

Supplementary Figure S4a. Grade $\geq$ 3 adverse events in controlled groups (Fixed model).

Supplementary Figure S4b. Grade $\geq$ 3 adverse events in controlled groups (Random model).

Supplementary Figure S1a. All grade adverse events in single arm groups (Fixed model).

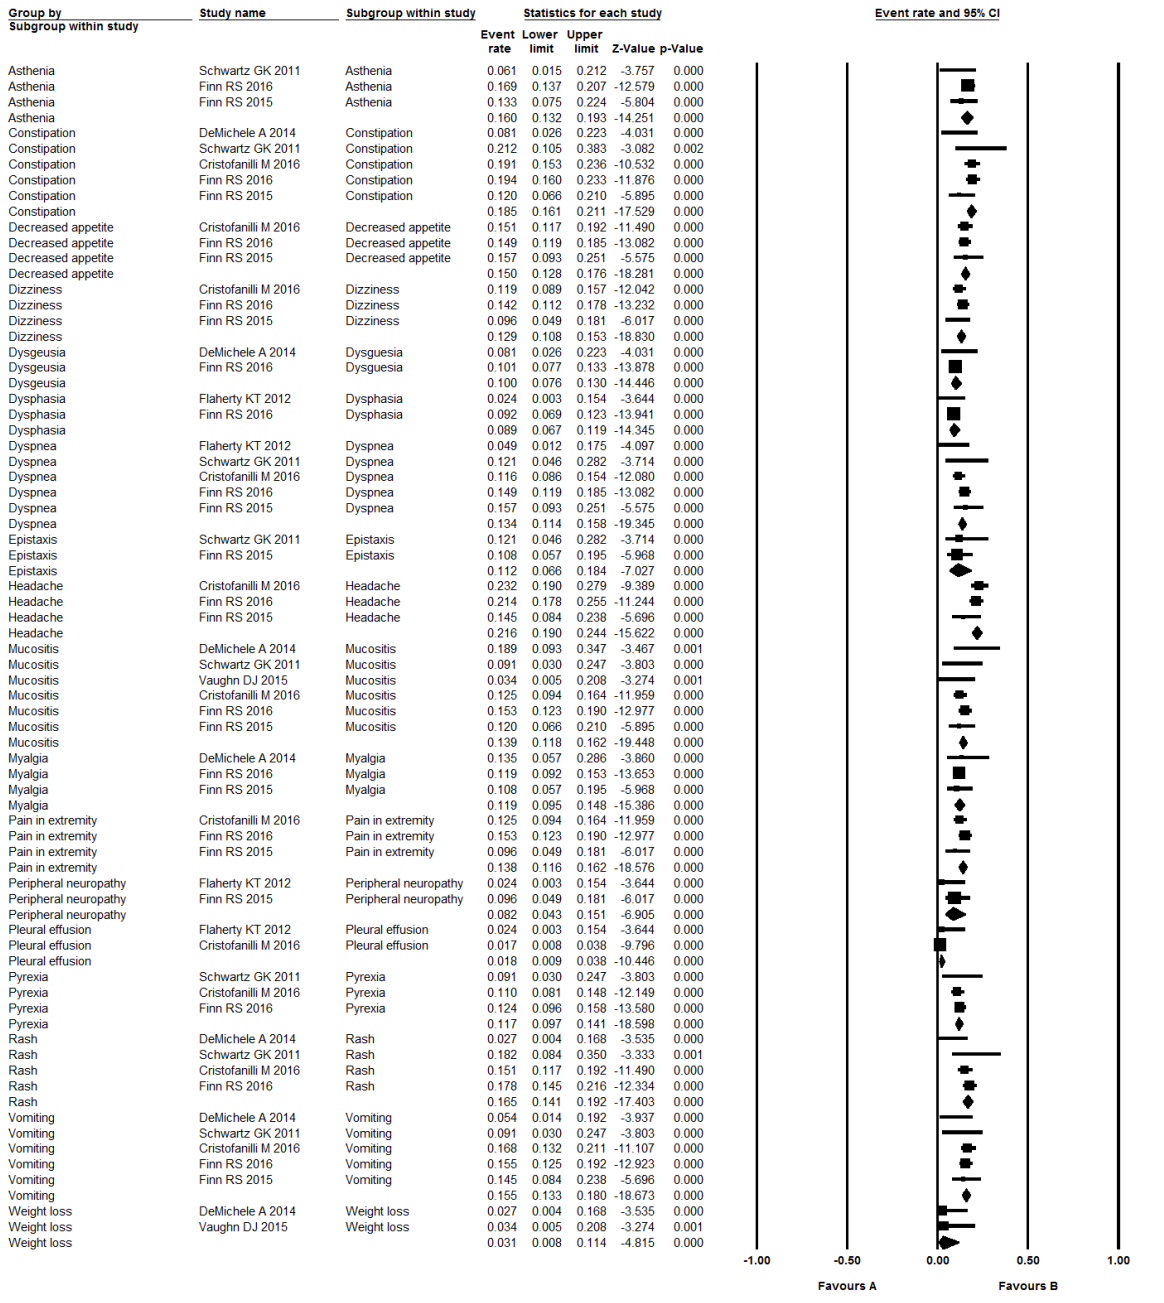

### Supplementary Figure S1b. All grade adverse events in single arm groups (Random model).

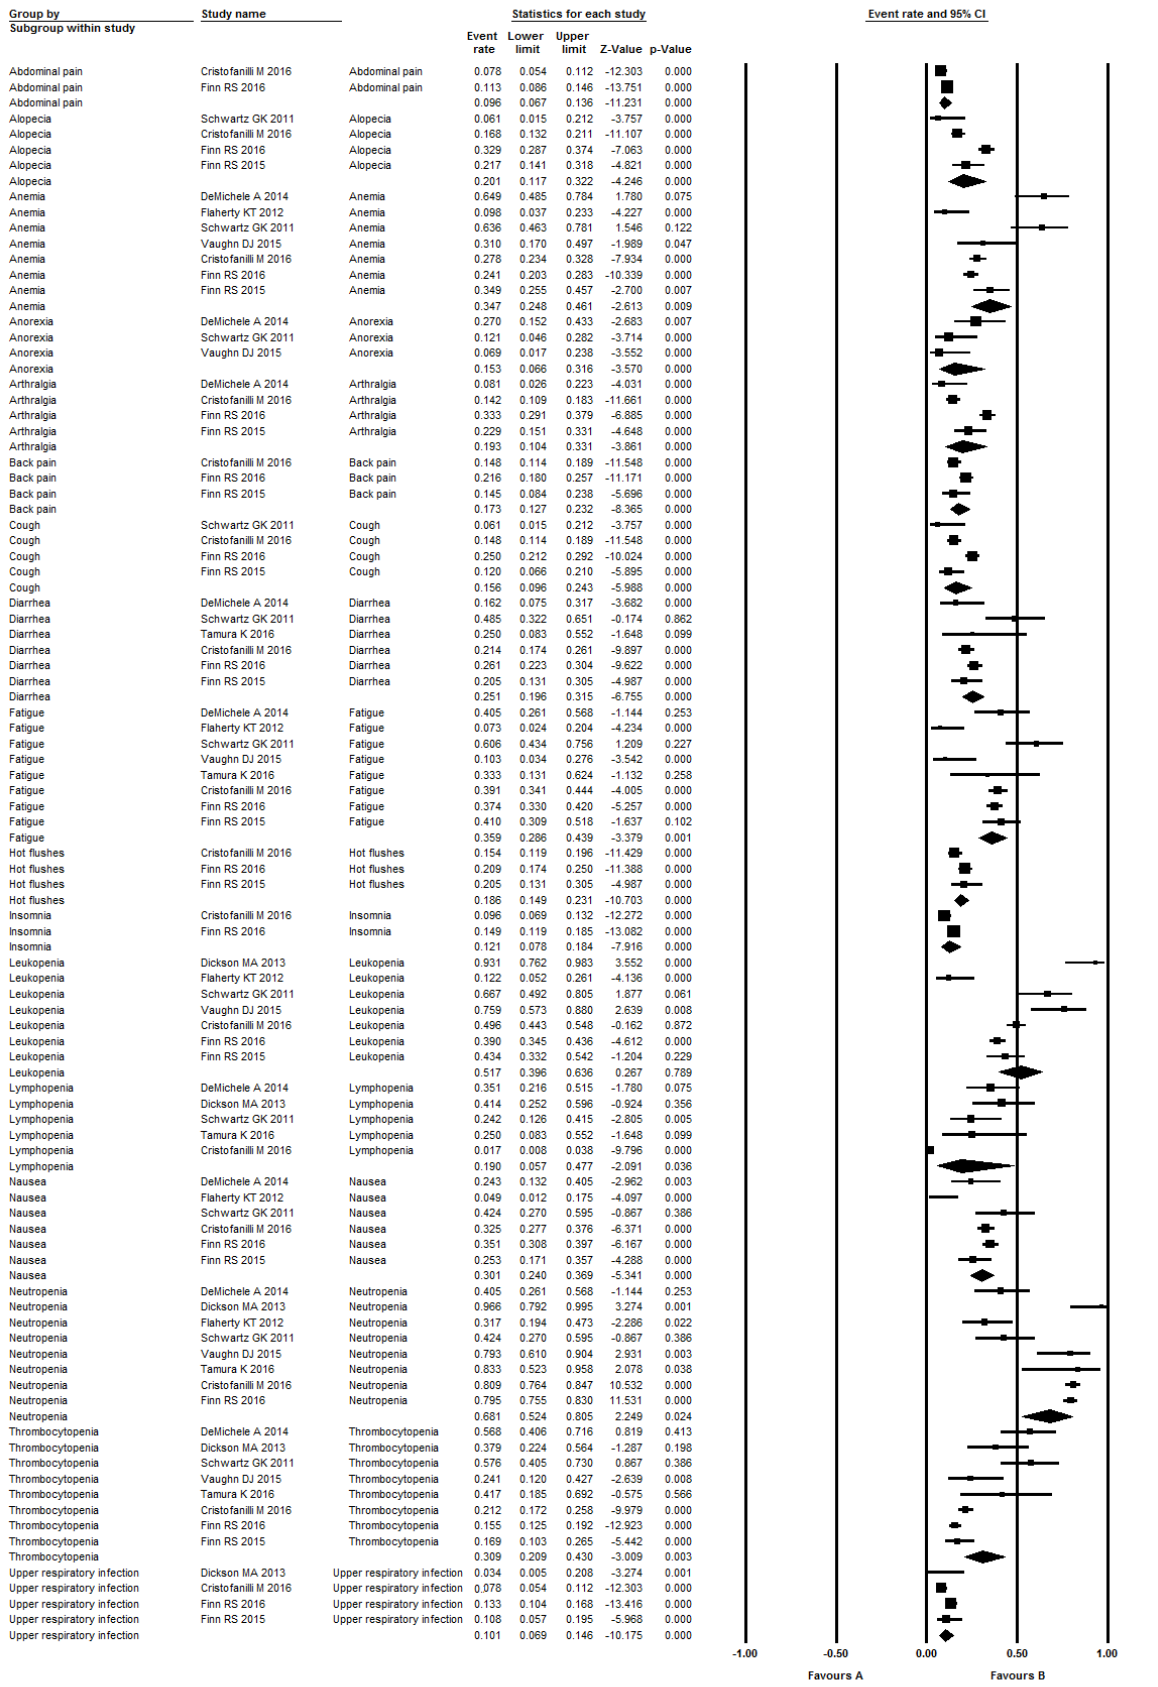

Supplementary Figure S2a. Grade ≥ 3 adverse events in single arm groups (Fixed model).

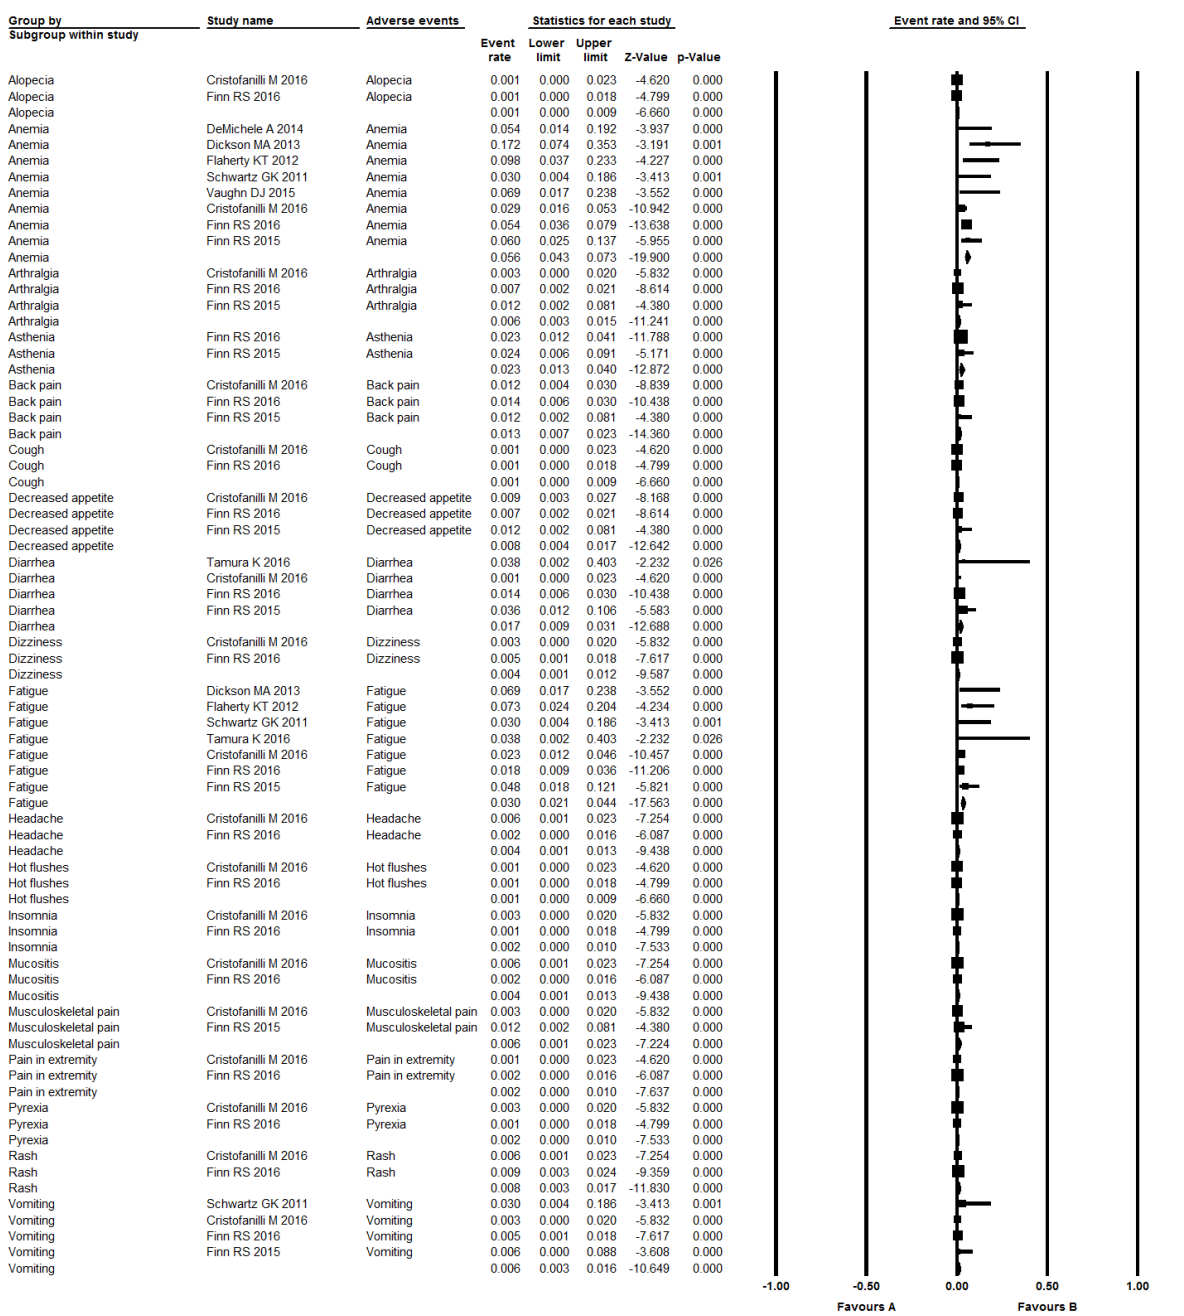

Supplementary Figure S2b. Grade ≥ 3 adverse events in single arm groups (Random model).

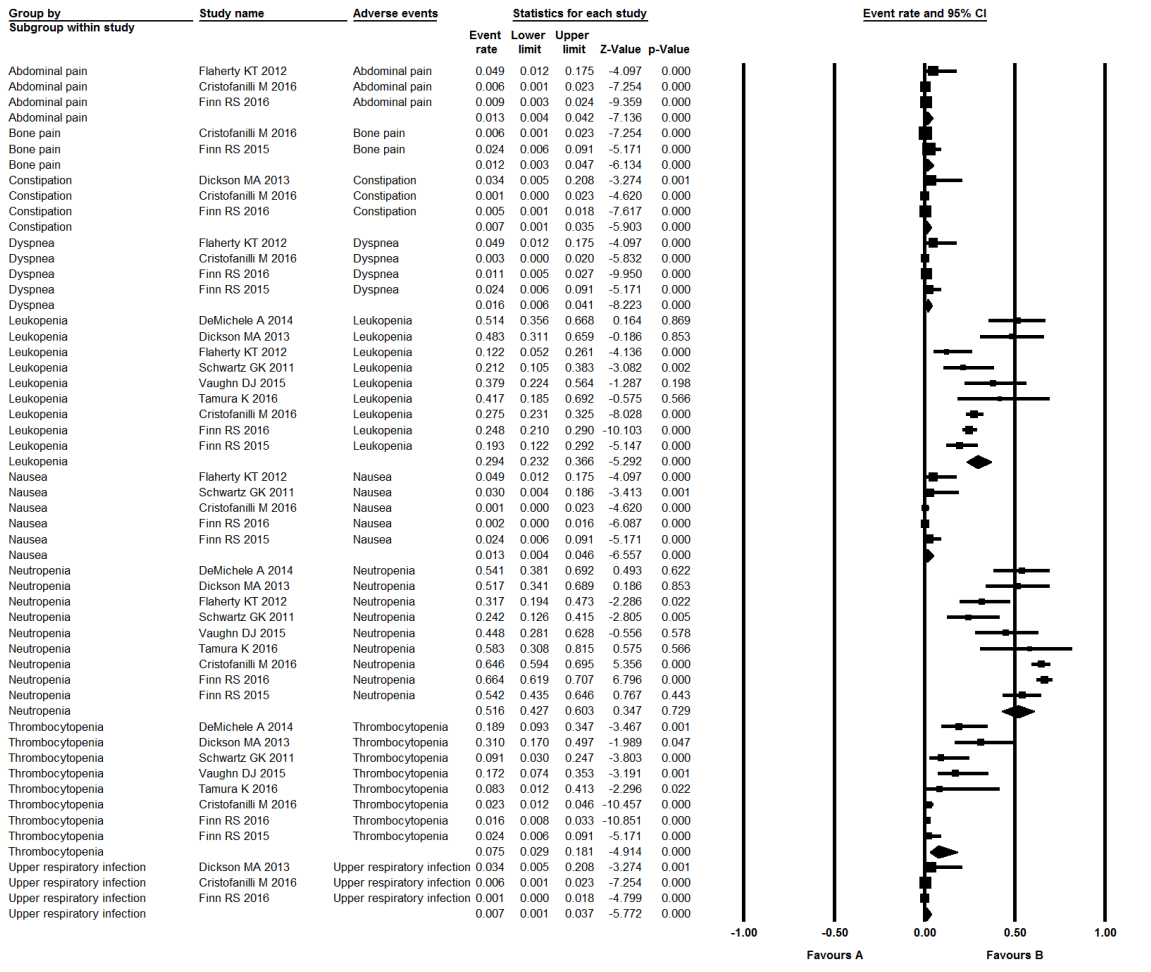

**Supplementary Figure S3a. All grade adverse events in controlled groups (Fixed model).**

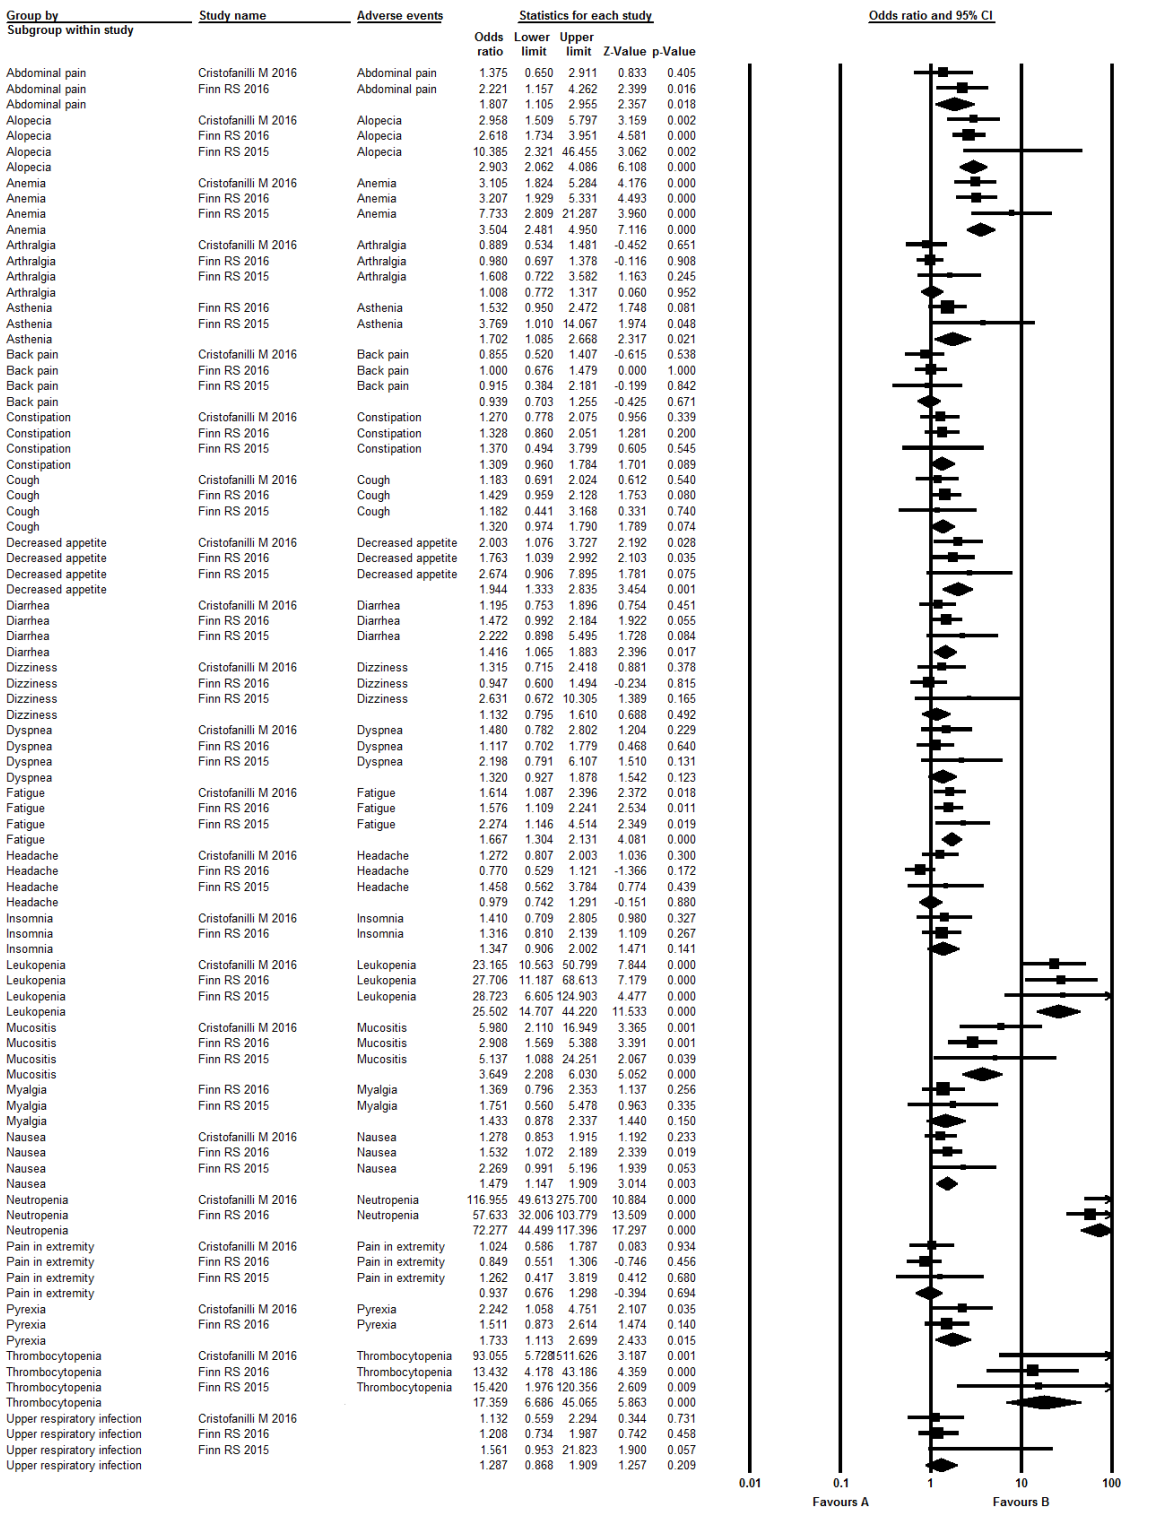

**Supplementary Figure S3b. All grade adverse events in controlled groups (Random model).**

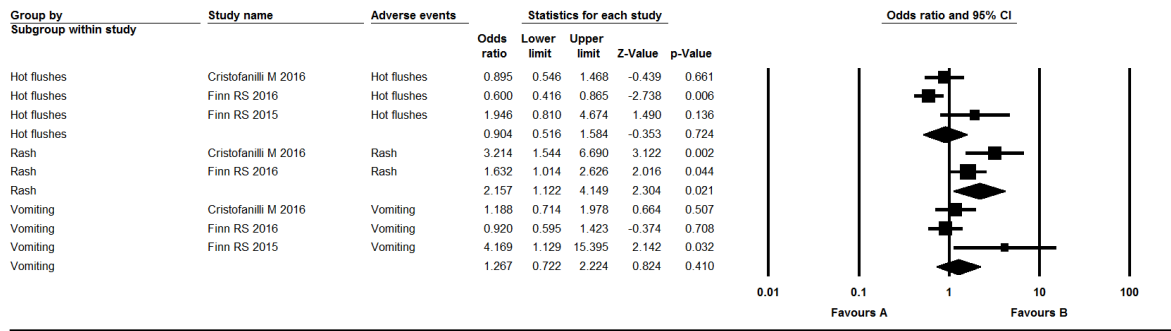

**Supplementary Figure S4a. Grade≥3 adverse events in controlled groups (Fixed model).**

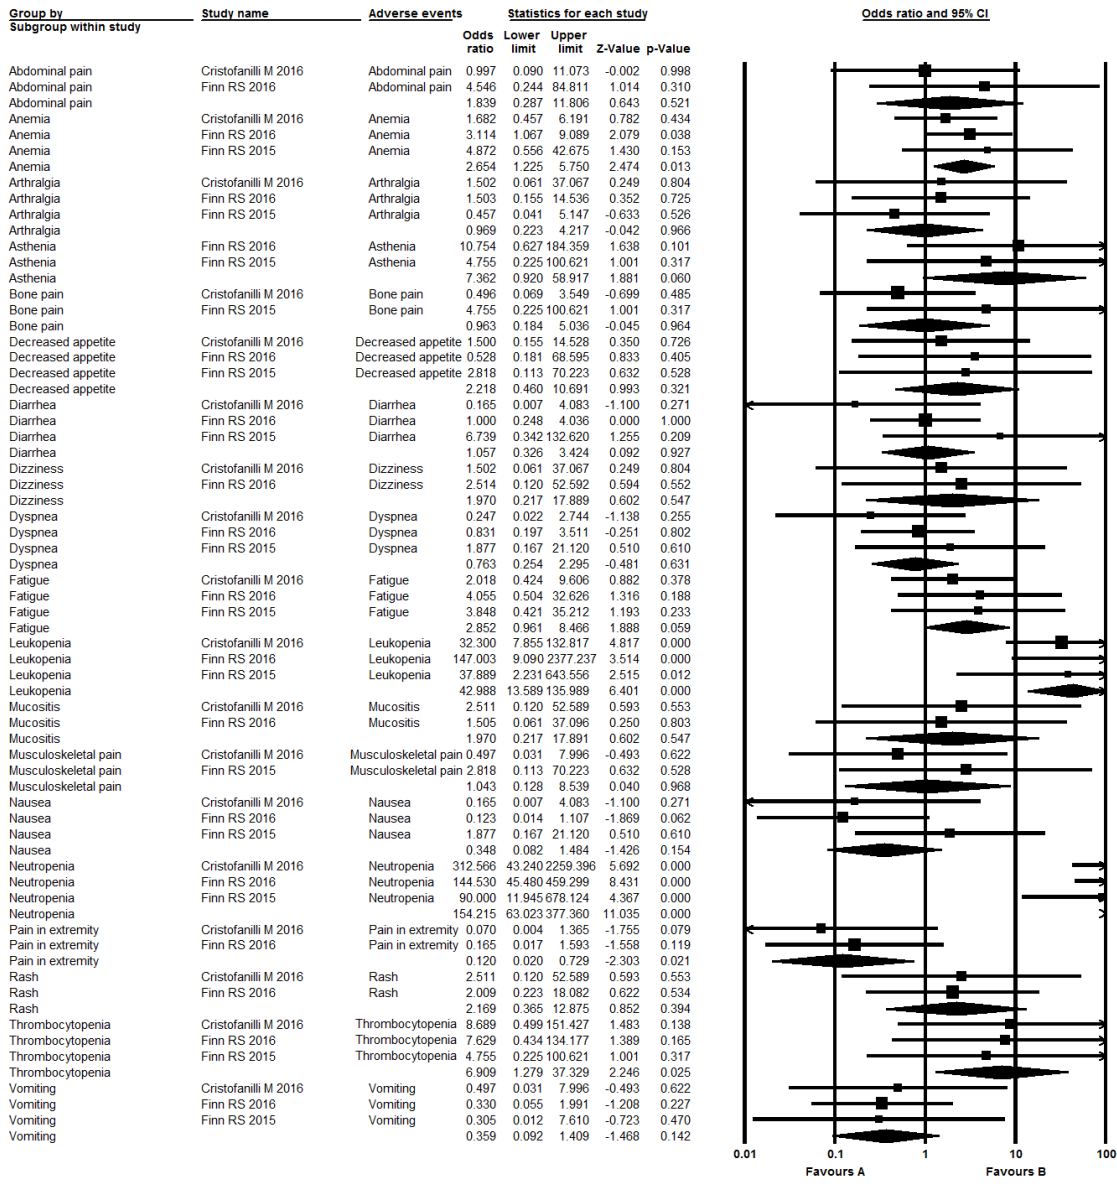

**Supplementary Figure S4b. Grade≥3 adverse events in controlled groups (Random model).**

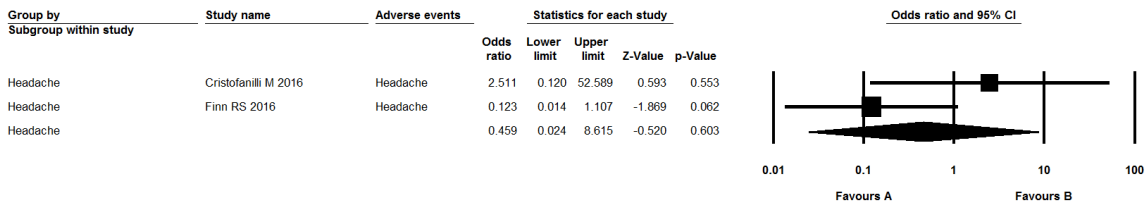

Supplement: CAM4-8-1389-s001.pdf [file CAM4-8-1389-s001.pdf]
